# Supplementary material for: Flexible PVDF/carbon materials/Ni composite films maintaining strong electromagnetic wave shielding under cyclic microwave irradiation
Source: Royal Society of Chemistry journal article supplement (doi:10.1039/c9tc05462f), 2019-11-04
Supplement: c9tc05462f1.pdf [file c9tc05462f1.pdf]

# **Flexible PVDF/carbon materials/Ni composite films maintaining strong electromagnetic wave shielding under cyclic microwave irradiation**

Biao Zhao,<sup>a</sup> Shuiping Zeng,<sup>b</sup> Xiping Li,<sup>b,\*</sup> Xiaoqin Guo,<sup>a</sup> Zhongyi Bai,<sup>a</sup> Bingbing Fan,<sup>c</sup> Rui Zhang,<sup>a,c,\*</sup>

<sup>a</sup> Henan Key Laboratory of Aeronautical Materials and Application Technology,  
School of Material Science and Engineering, Zhengzhou University of Aeronautics,  
Zhengzhou, Henan 450046, PR China

<sup>b</sup> College of Engineering, Zhejiang Normal University, Jinhua, Zhejiang 321004, PR  
China

<sup>c</sup> School of Material Science and Engineering, Zhengzhou University, Zhengzhou,  
Henan 450001, PR China

## ***Corresponding Author:***

Prof. Xiping Li

E-mail address: xpl2005@163.com

Prof. Rui Zhang

E-mail address: [zhangray@zua.edu.cn](mailto:zhangray@zua.edu.cn)

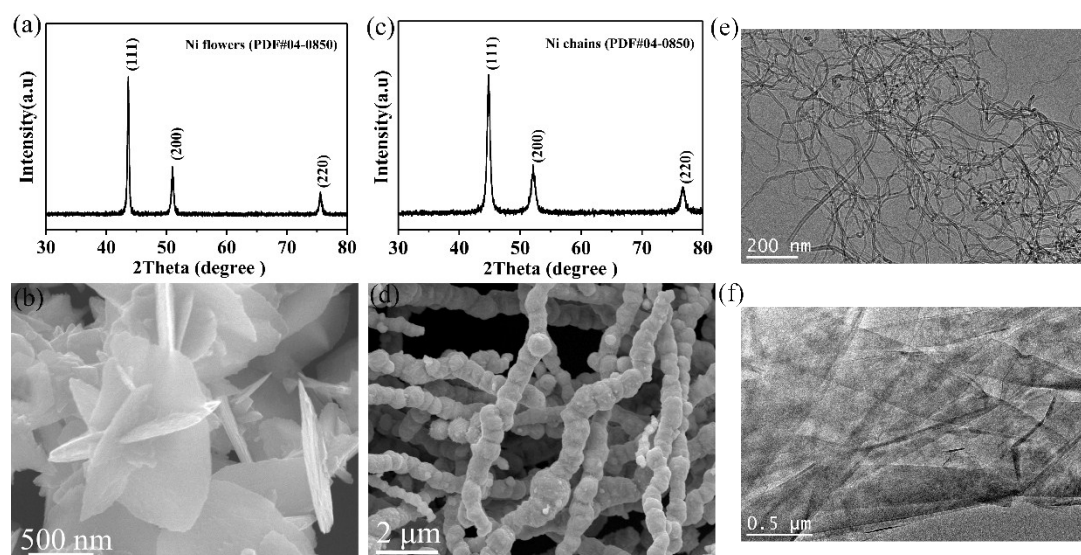

Figure S1. (a) XRD pattern and (b) SEM image of Ni flowers; (c) XRD pattern and (d) SEM image of Ni chains; TEM images of (e) MWCNTs and (f) GnPs.

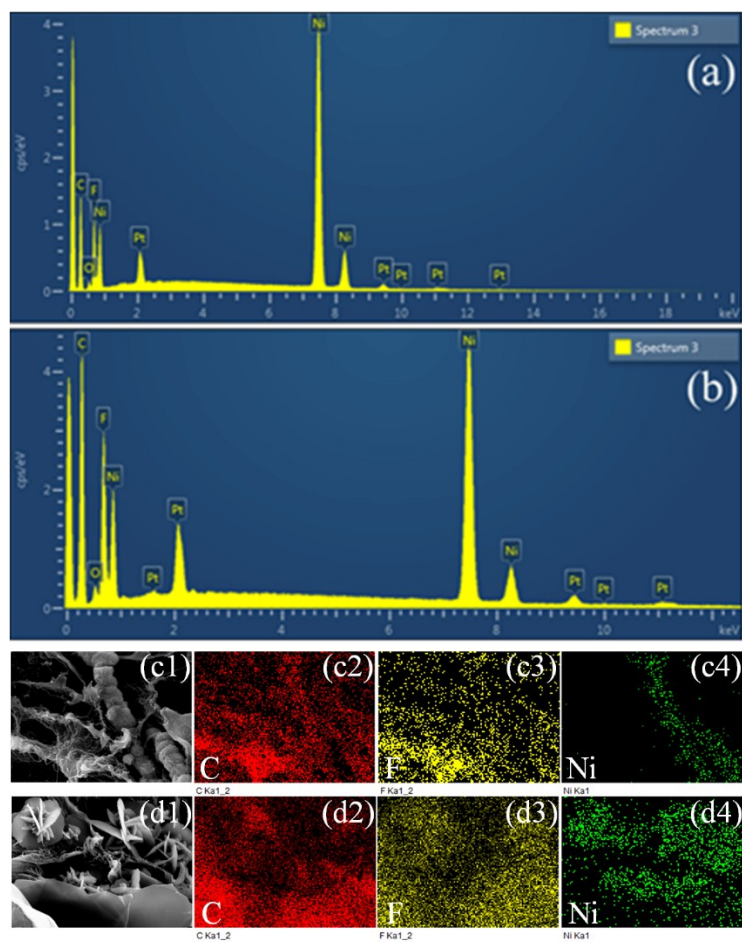

Figure S2. EDS patterns of (a) Ni-C-8 and (b) Ni-F-8 samples; (c1-c4) SEM image and elemental mapping (Ni, C and F) of Ni-C-8 sample; (d1-d4) SEM image and elemental mapping (Ni, C and F) of Ni-F-8 sample.

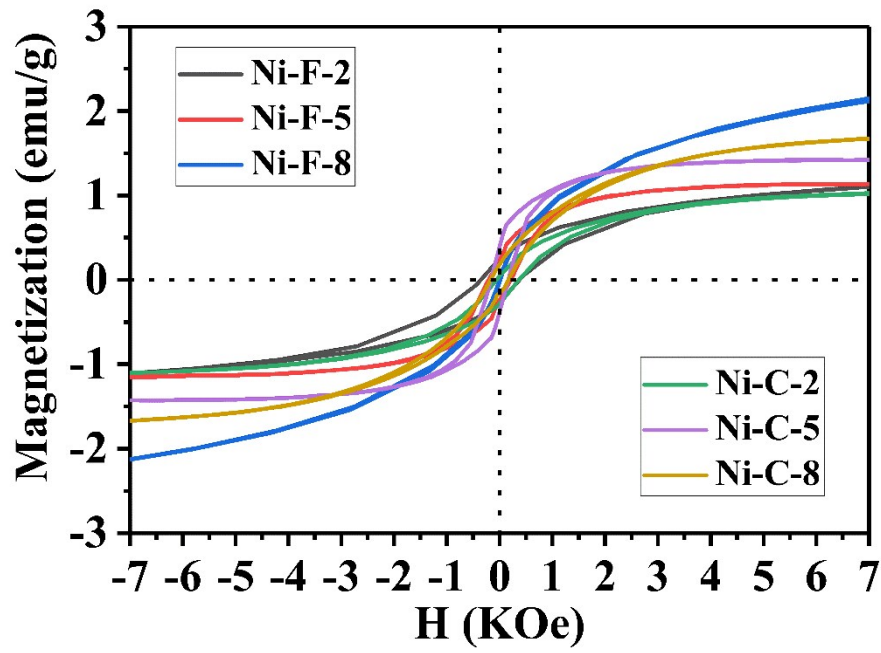

Figure S3. Magnetic hysteresis loops of PVDF/MWCNT/GnPs/Ni composite films.

Table S1. The  $M_s$  value of PVDF/MWCNT/GnPs/Ni composite films.

| Sample      | Ni-F-2 | Ni-F-5 | Ni-F-8 | Ni-C-2 | Ni-C-5 | Ni-C-8 |
|-------------|--------|--------|--------|--------|--------|--------|
| $M_s$ value | 1.13   | 1.19   | 2.15   | 1.03   | 1.42   | 1.68   |

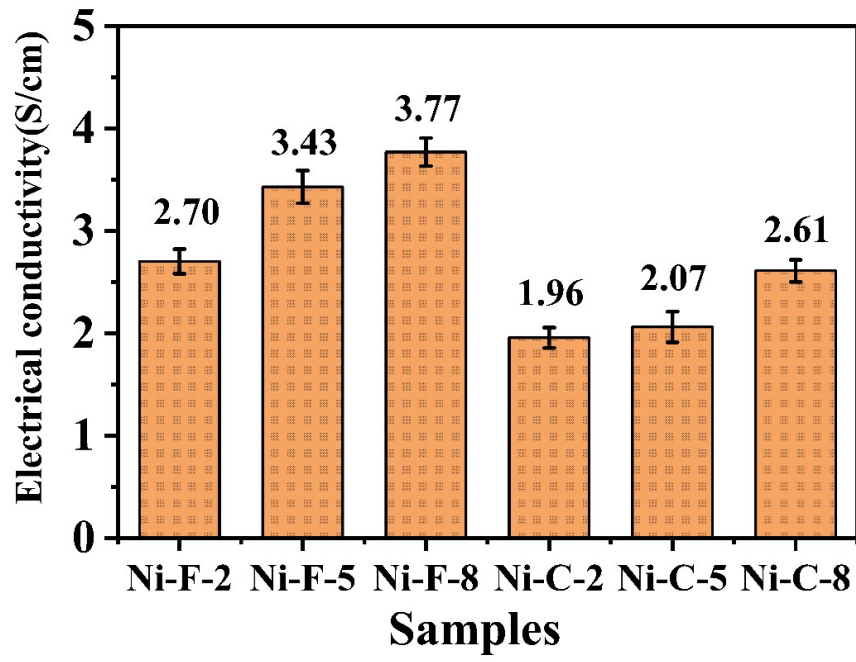

Figure S4. Electrical conductivity of PVDF/MWCNT/GnPs/Ni composite films.

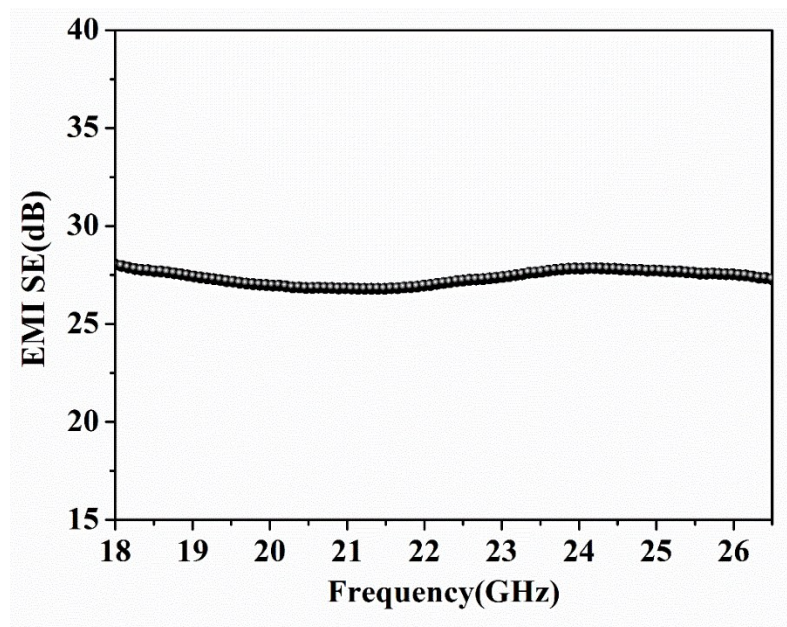

Figure S5. EMI shielding effectiveness of PVDF/3wt%MWCNT/6wt%GnPs composite film.

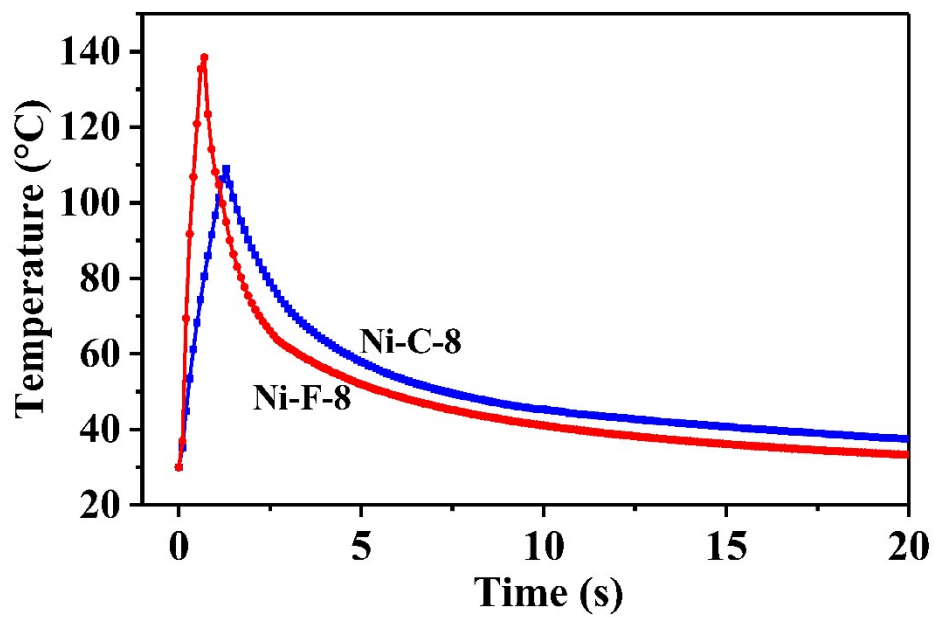

Figure S6. Temperature–time curves of the Ni-F-8 and Ni-C-8 flexible films during one time cyclic microwave irradiation

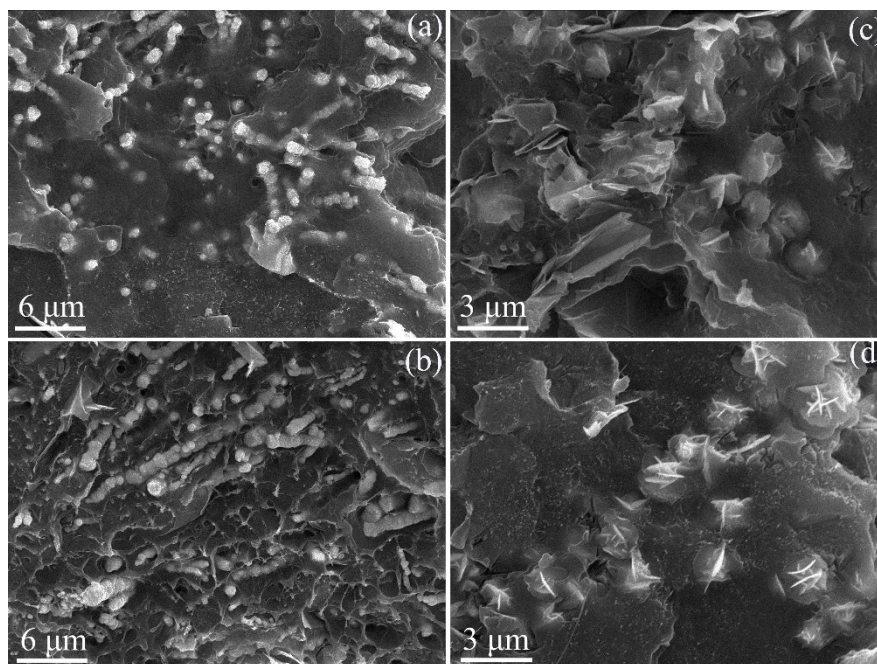

Figure S7. SEM images of (a) Ni-C-8(5), (b) Ni-C-8(20), (c) Ni-F-8(5) and (d) Ni-F-8(20) composite films;

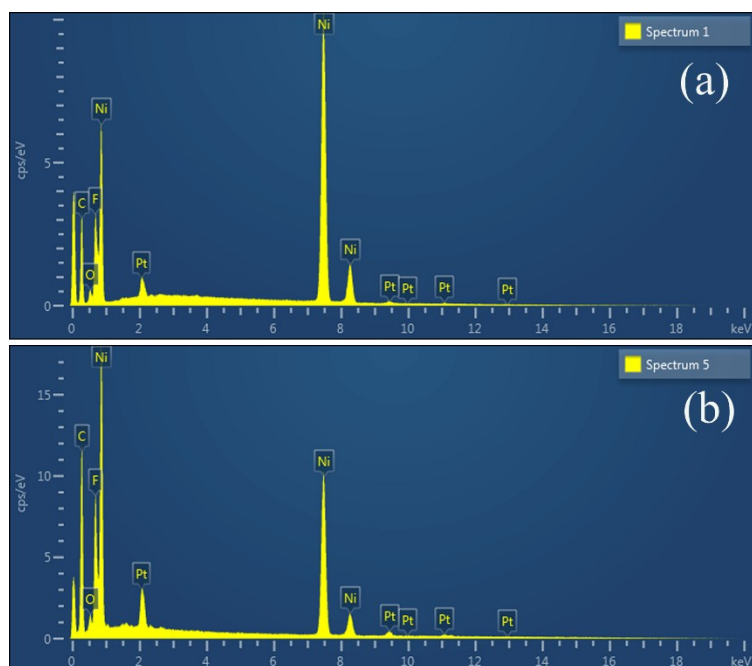

Figure S8. EDS patterns of (a) Ni-C-8(20) and Ni-F-8(20) samples

Table S2. The atomic ratio between Ni/O for the Ni-C-8, Ni-C-8(20), Ni-F-8 and Ni-F-8(20) samples

| Samples    | Ni-C-8   | Ni-C-8(20) | Ni-F-8   | Ni-F-8(20) |
|------------|----------|------------|----------|------------|
| Ni/O ratio | 20.1:2.3 | 21.2:3.2   | 10.3:2.3 | 9.0:3.3    |

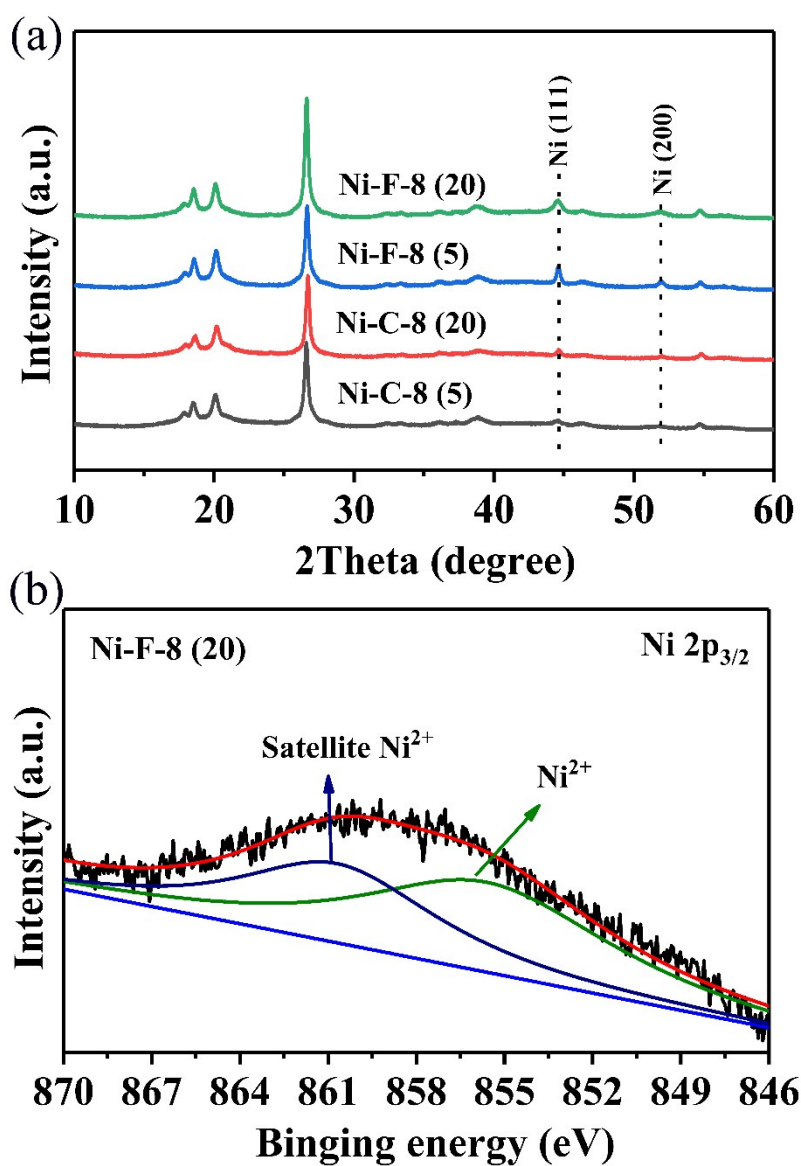

Figure S9. (a) XRD patterns of Ni-F-8 and Ni-C-8 films after 5 times and 20 times microwave irradiation; (b) XPS spectrum of Ni 2p<sub>3/2</sub> for Ni-F-8(20) flexible film.
